# Supplementary material for: RNAi efficacy is enhanced by chronic dsRNA feeding in pollen beetle
Source: PubMed Central journal article supplement (PMC8024372; doi:10.1038/s42003-021-01975-9), 2021-04-06
Supplement: 42003_2021_1975_MOESM2_ESM.pdf [file 42003_2021_1975_MOESM2_ESM.pdf]

## Description of Additional Supplementary Files

**File name:** Supplementary Data 1

**Description:** Source data for Fig 1 and Fig 2.
